# Supplementary figures and images for: Wnt inhibition enhances browning of mouse primary white adipocytes
Source: PubMed Central journal article supplement — Adipocyte. 2016 Mar 22;5(2):224–31. doi: 10.1080/21623945.2016.1148834 (PMC4916886; doi:10.1080/21623945.2016.1148834), 2016-03-22

A

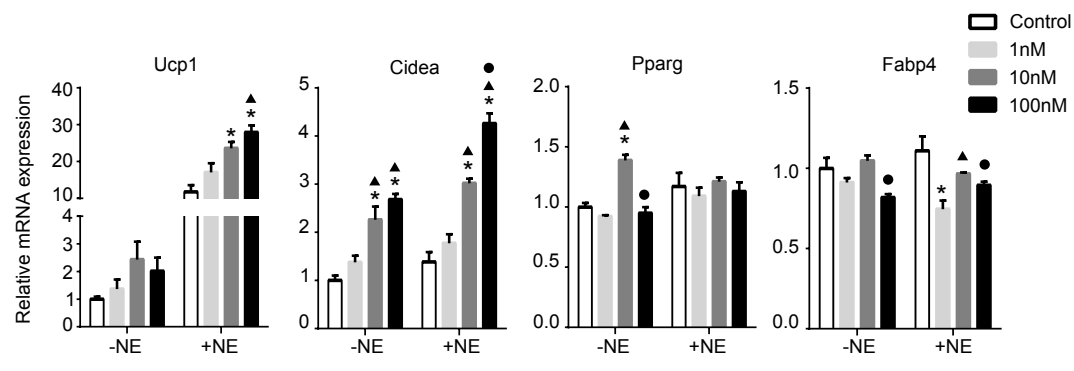

B

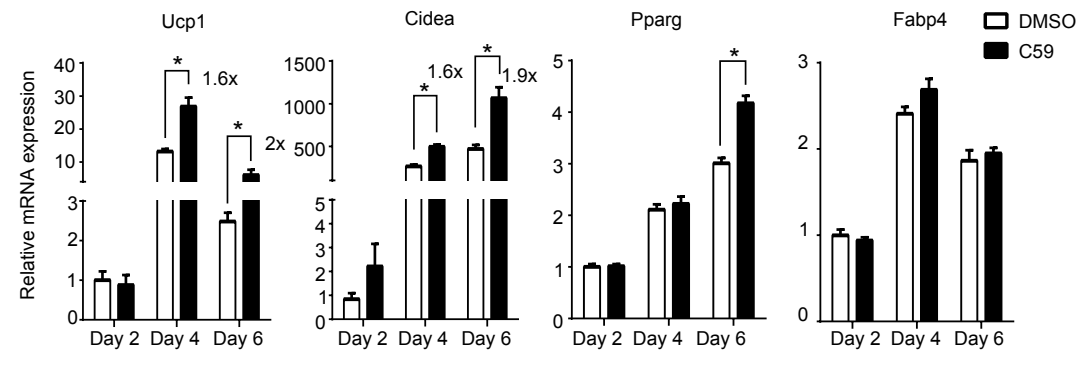

C

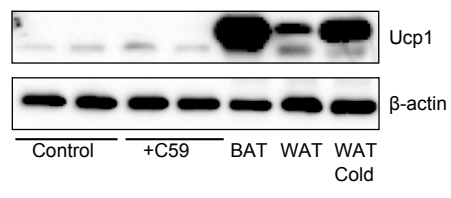

Supplement: kadi-05-02-1148834-s001.pdf [file kadi-05-02-1148834-s001.pdf]
